# Supplementary material for: Minimum Wage and Overweight and Obesity in Adult Women: A Multilevel Analysis of Low and Middle Income Countries
Source: PLOS journal article supplement (doi:10.1371/journal.pone.0150736), 2016-03-10
Supplement: S5 (10.1371/journal.pone.0150736.s005) [file journal.pone.0150736.s005]

**S3 Table Association of monthly minimum wage with overweight and obesity in adult women using pooled data with interaction terms**

|                                 | All countries |                | Low-income countries |                | Middle-income countries |                  |
|---------------------------------|---------------|----------------|----------------------|----------------|-------------------------|------------------|
| Odds ratios (CI95)              | 1.0004***     | 1.0002, 1.0006 | 1.0045***            | 1.0040, 1.0050 | 0.9993***               | 0.9991, 0.9996   |
| Predicted prevalence difference | .00007***     | .00003, .0001  | .00075***            | .00065, .00084 | -.00014                 | -.00019, -.00009 |

Odds ratios (95% CI) obtained by two-level random intercept model. Development-specific estimates with interaction term between minimum wage (continuous) and income group (binary). Sample restricted to adult women (24-49 y), n =162 446. Level 2 residual variance was =.3102 (SE .1743). Variance Partition Coefficient (VPC) = 0.086. Post-estimation of predicted probability of being overweight with 1-unit change in minimum wage obtained using average marginal effects with respect to minimum wage over country income group. \*\*\*p<0.001, \*\*p<0.01, \*p<0.05.
